# Supplementary material
Source: publisher site journal article supplement (https://www.dovepress.com/article/286813)
Supplement: Supplementary file 1 [file get_supplementary_file.php]

**Supplementary materials
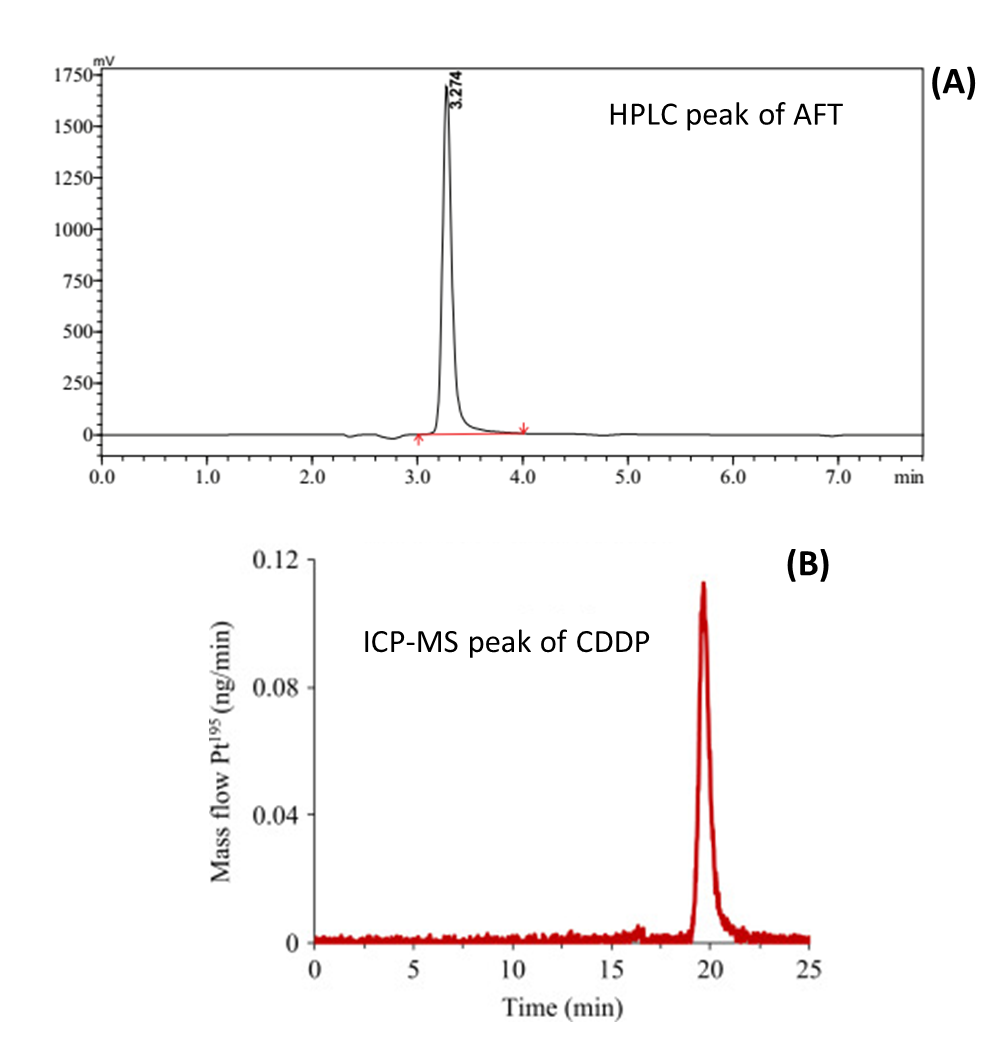
**

*Figure S1:* (A) Representative HPLC analysis of AFT; (B) representative ICP-MS analysis of CDDP.

**
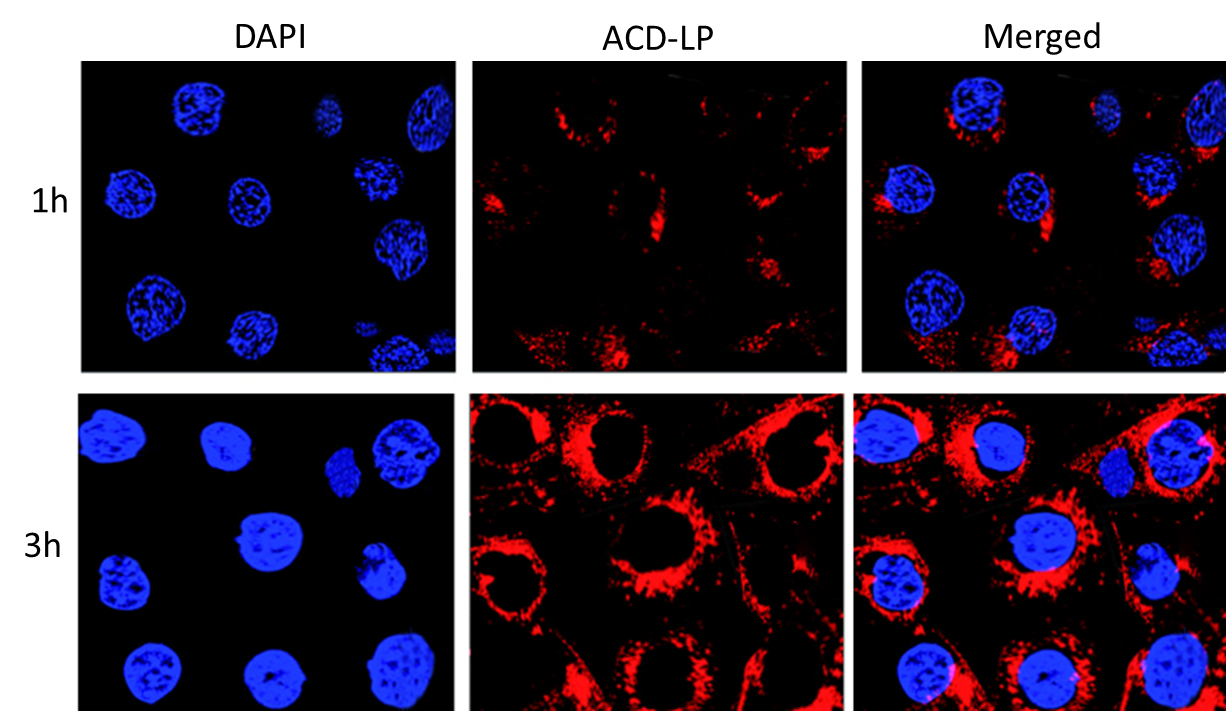
**

*Figure S2:* Cellular uptake analysis of ACD-LP in HONE1 cells after 1h and 3h of respective incubation. The cellular uptake is analyzed using confocal laser scanning microscope (CLSM).

*Figure S3:* Concentration-dependent cell viability analysis of AFT and CDDP in C666-1 nasopharyngeal cancer cells

*Figure S4:* In vitro cytotoxicity assay of free drugs and drug-loaded formulations in C666-1 cells after 24h incubation. The cytotoxicity assay performed by MTT protocol.
